# Supplementary material
Source: publisher figshare collection journal article supplement (https://frontiersin.figshare.com/ndownloader/files/12469550)
Supplement: Supplementary file [file 12469550]

| Name                          | Acidobacteria_Subdivision8_Amazon_FNV_2_1 | Bacteroidetes_Amazon_FNV_2010_21_2 | Methylothermobacteria_Amazon_FNV_2010_23_1 | Acidobacteria_Amazon_FNV_2010_25_1 | Acidobacteria_Subdivision8_Amazon_FNV_2_1 | Proteobacteria_Amazon_FNV_2010_19_4 | Proteobacteria_Amazon_FNV_2010_31_3 | Acidobacteria_Amazon_FNV_2010_29_1_1 |
|-------------------------------|-------------------------------------------|------------------------------------|--------------------------------------------|------------------------------------|-------------------------------------------|-------------------------------------|-------------------------------------|--------------------------------------|
| Analysis Project Type         | MAG                                       | MAG                                | MAG                                        | MAG                                | MAG                                       | MAG                                 | MAG                                 | MAG                                  |
| Taxa ID approach              | multi marker approach                     | multi marker approach              | multi marker approach                      | multi marker approach              | multi marker approach                     | multi marker approach               | multi marker approach               | multi marker approach                |
| Taxa ID                       | Bacteria                                  | Bacteria                           | Bacteria                                   | Bacteria                           | Bacteria                                  | Bacteria                            | Bacteria                            | Bacteria                             |
| Assembly software             | anvi'o                                    | anvi'o                             | anvi'o                                     | anvi'o                             | anvi'o                                    | anvi'o                              | anvi'o                              | anvi'o                               |
| Annotation pipeline/tool      | PATRIC/RAST                               | PATRIC/RAST                        | PATRIC/RAST                                | PATRIC/RAST                        | PATRIC/RAST                               | PATRIC/RAST                         | PATRIC/RAST                         | PATRIC/RAST                          |
| Quality                       | medium-quality                            | medium-quality                     | medium-quality                             | medium-quality                     | medium-quality                            | medium-quality                      | medium-quality                      | medium-quality                       |
| Completion (%)                | 68.03                                     | 67.24                              | 63.73                                      | 59.67                              | 58.77                                     | 55.51                               | 53.51                               | 52.59                                |
| Contamination (%)             | 5.93                                      | 3.42                               | 1.16                                       | 0.85                               | 3.6                                       | 3.36                                | 0.18                                | 2.35                                 |
| completeness software         | anvi'o                                    | anvi'o                             | anvi'o                                     | anvi'o                             | anvi'o                                    | anvi'o                              | anvi'o                              | anvi'o                               |
| number of contigs             | 405                                       | 274                                | 294                                        | 359                                | 436                                       | 490                                 | 258                                 | 366                                  |
| 16S recovered                 | putative                                  | putative                           | no                                         | no                                 | no                                        | no                                  | putative                            | no                                   |
| 16S recovery software         | checkM                                    | checkM                             | checkM                                     | checkM                             | checkM                                    | checkM                              | checkM                              | checkM                               |
| total # tRNAs                 | 24                                        | 36                                 | 18                                         | 9                                  | 4                                         | 8                                   | 6                                   | 5                                    |
| # of standard tRNAs extracted | 13                                        | 16                                 | 11                                         | 8                                  | 3                                         | 6                                   | 4                                   | 5                                    |
| tRNA detection software       | Aragorn                                   | tRNAscan-se                        | tRNAscan-se                                | tRNAscan-se                        | tRNAscan-se                               | tRNAscan-se                         | tRNAscan-se                         | tRNAscan-se                          |
| length (Mb)                   | 7.44                                      | 4.43                               | 3.04                                       | 2.6                                | 3.57                                      | 3.34                                | 2.13                                | 3.04                                 |
| GC content(%)                 | 60.03                                     | 39.56                              | 50.61                                      | 47.35                              | 50.88                                     | 63.52                               | 60.69                               | 61.41                                |
| # CDS                         | 6869                                      | 4119                               | 2991                                       | 2630                               | 3376                                      | 3545                                | 2145                                | 3065                                 |
| NSO                           | 24087                                     | 20381                              | 11292                                      | 7198                               | 8339                                      | 6628                                | 8155                                | 8548                                 |
| completeness approach         | marker gene based                         | marker gene based                  | marker gene based                          | marker gene based                  | marker gene based                         | marker gene based                   | marker gene based                   | marker gene based                    |
| decontamination software      | anvi'o                                    | anvi'o                             | anvi'o                                     | anvi'o                             | anvi'o                                    | anvi'o                              | anvi'o                              | anvi'o                               |
| bin parameters                | kmer+coverage+codon usage                 | kmer+coverage+codon usage          | kmer+coverage+codon usage                  | kmer+coverage+codon usage          | kmer+coverage+codon usage                 | kmer+coverage+codon usage           | kmer+coverage+codon usage           | kmer+coverage+codon usage            |
| binning software              | anvi'o                                    | anvi'o                             | anvi'o                                     | anvi'o                             | anvi'o                                    | anvi'o                              | anvi'o                              | anvi'o                               |
| reassembly post binning       | no                                        | no                                 | no                                         | no                                 | no                                        | no                                  | no                                  | no                                   |
| mag coverage software         | anvi'o                                    | anvi'o                             | anvi'o                                     | anvi'o                             | anvi'o                                    | anvi'o                              | anvi'o                              | anvi'o                               |

| Name                          | Acidobacteria_Subdivision8_Amazon_FNV_20_2_3_8 | Acidobacteria_Amazon_FNV_2010_17_8 | Bacteroidetes_Amazon_FNV_2010_13_2 | Chloroflexi_Amazon_FNV_2010_25_1 |
|-------------------------------|------------------------------------------------|------------------------------------|------------------------------------|----------------------------------|
| Analysis Project Type         | MAG                                            | MAG                                | MAG                                | MAG                              |
| Taxa ID approach              | multi marker approach                          | multi marker approach              | multi marker approach              | multi marker approach            |
| Taxa ID                       | Bacteria                                       | Bacteria                           | Bacteria                           | Bacteria                         |
| Assembly software             | anvi'o                                         | anvi'o                             | anvi'o                             | anvi'o                           |
| Annotation pipeline/tool      | PATRIC/RAST                                    | PATRIC/RAST                        | PATRIC/RAST                        | PATRIC/RAST                      |
| Quality                       | medium-quality                                 | medium-quality                     | medium-quality                     | medium-quality                   |
| Completion (%)                | 51.96                                          | 51.59                              | 51.39                              | 51.38                            |
| Contamination (%)             | 0.81                                           | 1.57                               | 0.81                               | 2.47                             |
| completeness software         | anvi'o                                         | anvi'o                             | anvi'o                             | anvi'o                           |
| number of contigs             | 216                                            | 469                                | 275                                | 330                              |
| 16S recovered                 | no                                             | no                                 | putative                           | no                               |
| 16S recovery software         | checkM                                         | checkM                             | checkM                             | checkM                           |
| total # tRNAs                 | 3                                              | 21                                 | 32                                 | 11                               |
| # of standard tRNAs extracted | 2                                              | 10                                 | 14                                 | 8                                |
| tRNA detection software       | tRNAscan-se                                    | tRNAscan-se                        | tRNAscan-se                        | tRNAscan-se                      |
| length (Mb)                   | 1.57                                           | 3.4                                | 4.58                               | 2.61                             |
| GC content(%)                 | 51.8                                           | 55.46                              | 42.76                              | 58.44                            |
| # CDS                         | 1582                                           | 3925                               | 4733                               | 2831                             |
| NSO                           | 7154                                           | 6914                               | 22057                              | 7631                             |
| completeness approach         | marker gene based                              | marker gene based                  | marker gene based                  | marker gene based                |
| decontamination software      | anvi'o                                         | anvi'o                             | anvi'o                             | anvi'o                           |
| bin parameters                | kmer+coverage+codon usage                      | kmer+coverage+codon usage          | kmer+coverage+codon usage          | kmer+coverage+codon usage        |
| binning software              | anvi'o                                         | anvi'o                             | anvi'o                             | anvi'o                           |
| reassembly post binning       | no                                             | no                                 | no                                 | no                               |
| mag coverage software         | anvi'o                                         | anvi'o                             | anvi'o                             | anvi'o                           |
